# Supplementary material
Source: publisher figshare collection journal article supplement (https://karger.figshare.com/ndownloader/files/27686670)
Supplement: Supplementary file 1 [file 27686670]

Supplemental Figure 1.


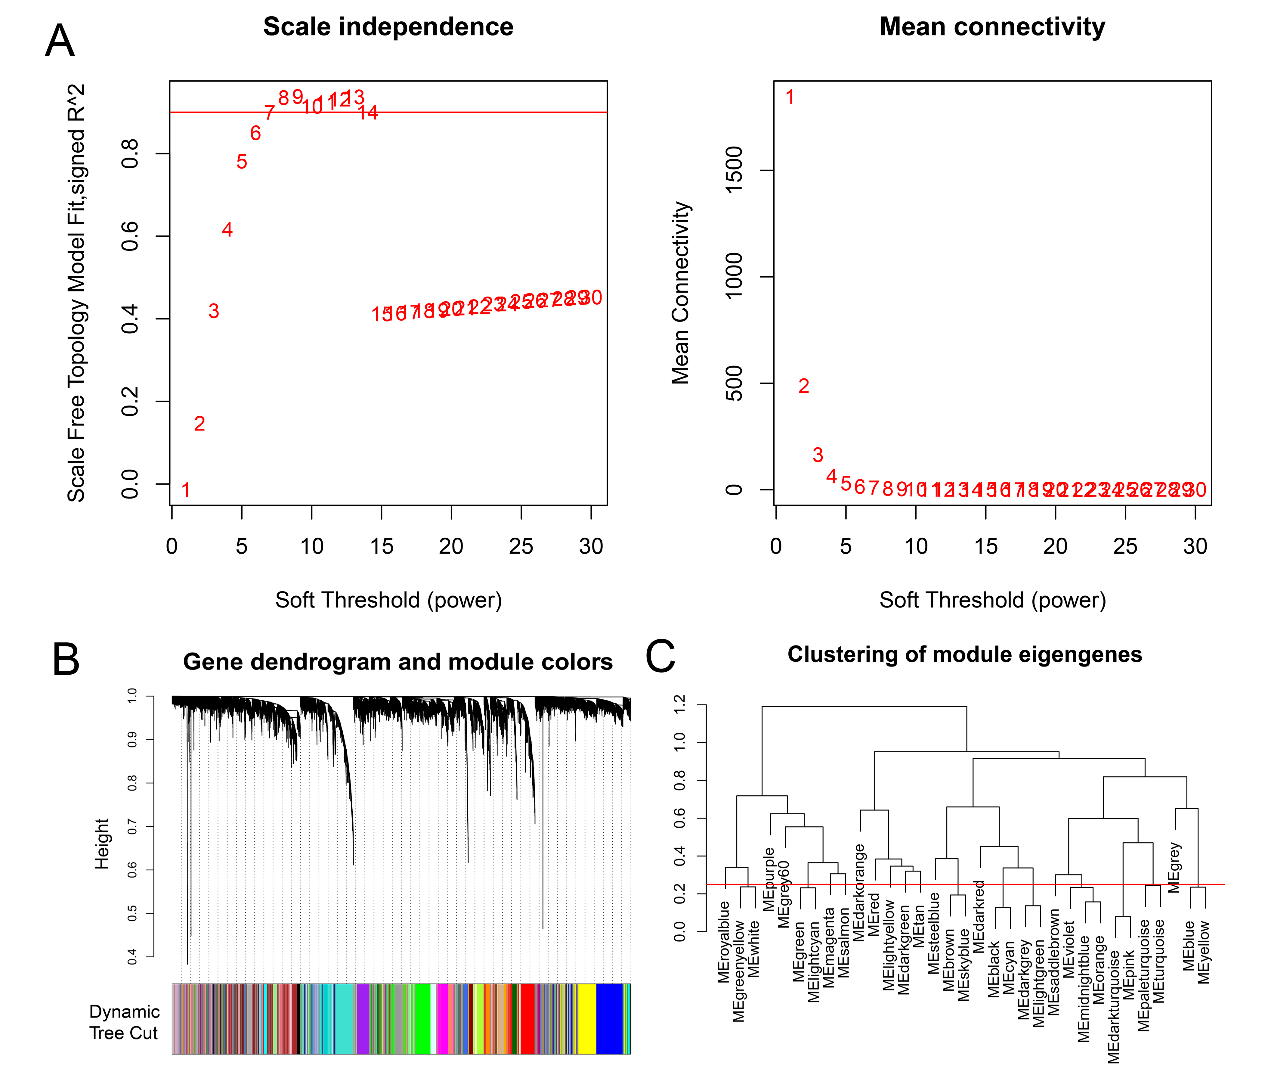


Supplemental Figure 1. (A)Analysis of the scale-free fit index (left) and the mean connectivity (right) for various soft-thresholding powers in GSE99339. (B) Dendrogram of all genes clustered based on a dissimilarity measure (1-TOM) in GSE99339. (C) Clustering of module eigengenes in GSE99339. The red line indicates cut height (0.25).
